# Supplementary material for: Modulation of insulin secretion by RBFOX2-mediated alternative splicing
Source: PubMed Central journal article supplement (PMC10676425; doi:10.1038/s41467-023-43605-4), 2023-11-25
Supplement: 41467_2023_43605_MOESM1_ESM.pdf [file 41467_2023_43605_MOESM1_ESM.pdf]

## **Modulation of insulin secretion by RBFOX2-mediated alternative splicing**

# Supplementary Figure 1

## A. Alternative splicing analysis

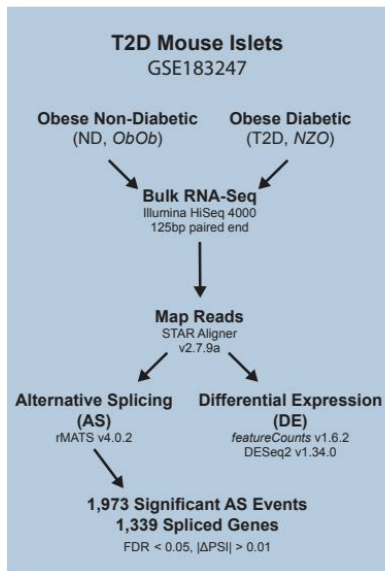

## B. Splicing pattern distribution

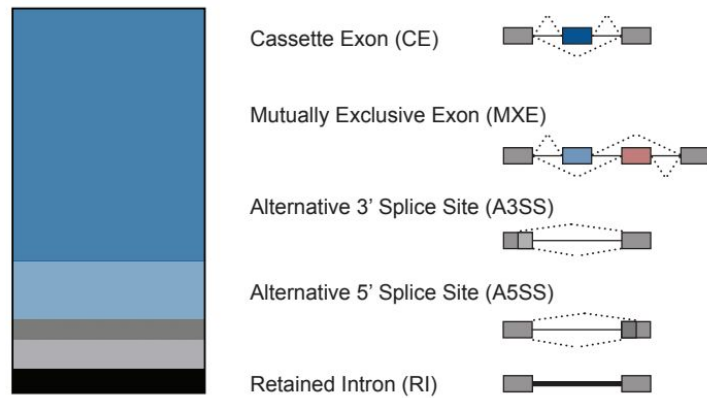

## C. *Rbfox1* and *Rbfox3* expression

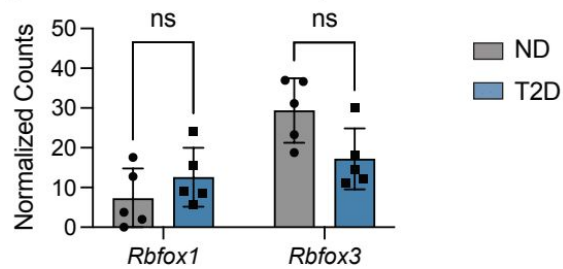

## D. *Rbfox* expression from scRNA-Seq in mouse islets (Tabula Muris)

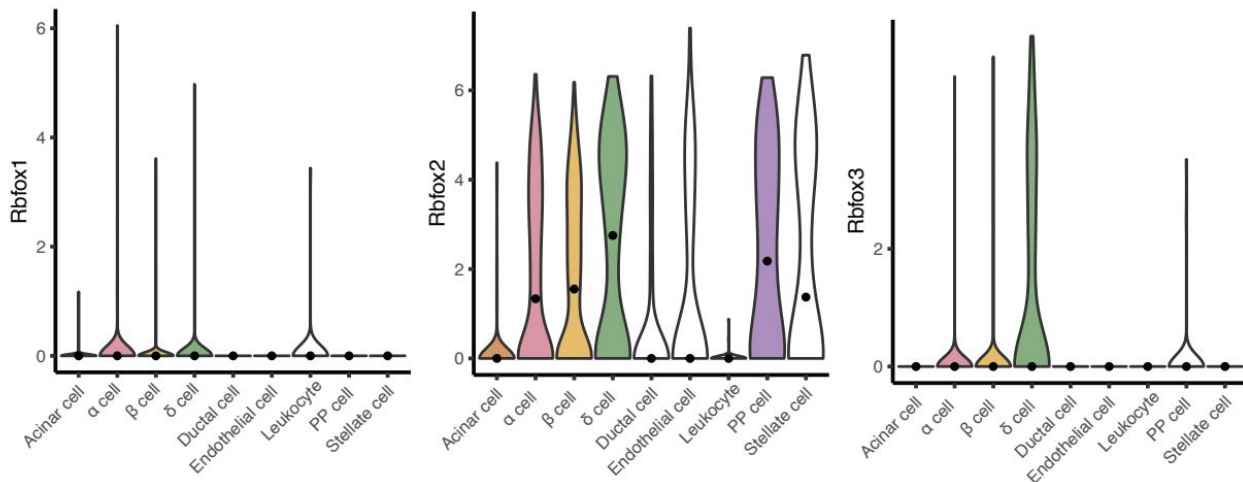

**Supplementary Figure 1. Related to Figure 1, RBFOX expression in mouse.** (A) Analysis pipeline for comparing alternative splicing and gene expression in obese (ND, *ObOb*) to obese diabetic (T2D, NZO) mouse islets (GSE183247). (B) Splicing pattern distribution of alternative splicing event types (GSE183247). (C) *Rbfox1* ( $p = 0.37$ ) and *Rbfox3* ( $p = 0.06$ ) expression in T2D islets compared to ND controls (GSE183247). (D) *Rbfox1*, *Rbfox2*, and *Rbfox3* expression in mouse islet cell types (GSE109774).

## Supplementary Figure 2

A. *RBFOX* expression from scRNA-Seq in human islets (Baron et al., 2016)

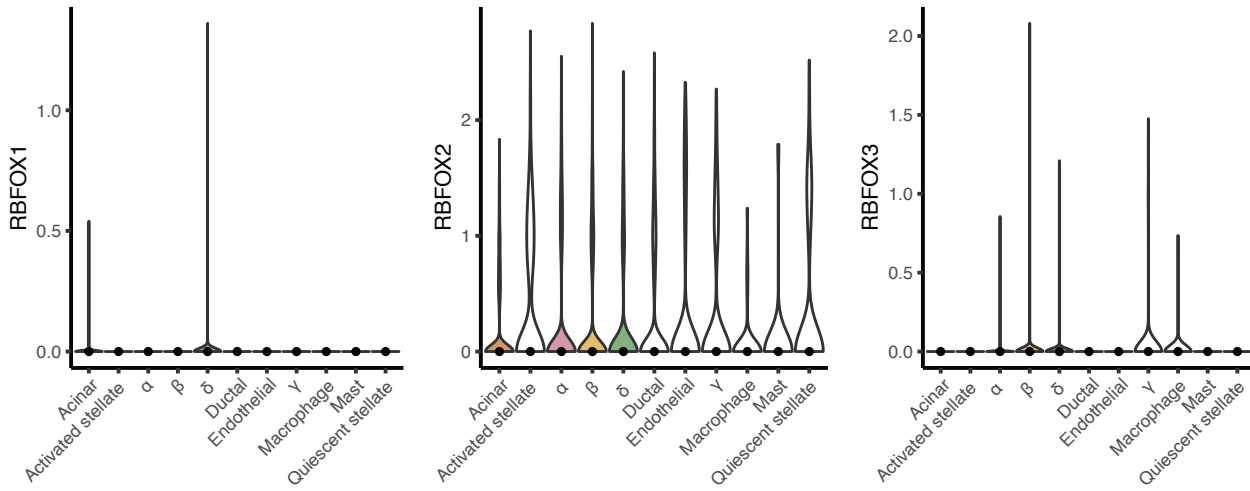

B. *RBFOX2* expression (human islets)

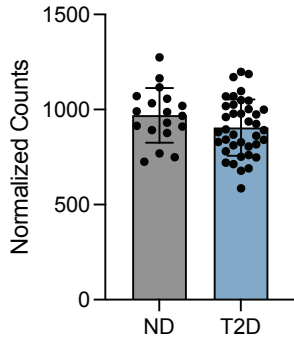

C. *RBFOX2* expression (human sorted  $\beta$  cells)

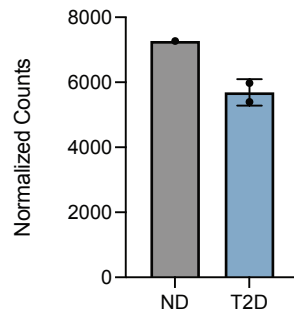

D. *RBFOX2* binding site enrichment near alternative exons (human islets)

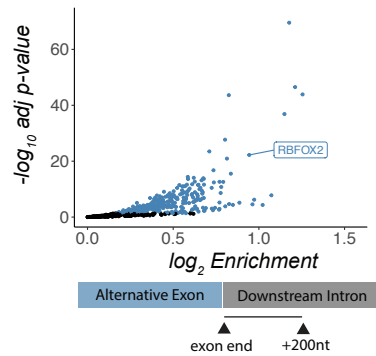

**Supplementary Figure 2. Related to Figure 1, *RBFOX2* expression in humans.** (A) *Rbfox1*, *Rbfox2*, and *Rbfox3* expression in human islet cell types (GSE84133). (B) *RBFOX2* expression in human islets from non-diabetic (ND, n = 18) and donors with type 2 diabetes (T2D, n = 39), DESeq2,  $p = 0.1462$  GSE164416). (C) *RBFOX2* expression in sorted human  $\beta$  cells from non-diabetic (ND, n = 1) and donors with type 2 diabetic (T2D, n = 2) (PANC-DB). (D) 5-mer enrichment 200nt downstream of alternative cassette exons identified from rMATS (FDR < 0.05,  $\Delta$ PSI > 0.01) in non-diabetic (ND, n = 18) and type 2 diabetic (T2D, n = 39) human islets (GSE164416), enrichment relative to constitutive exons plotted adj p-value determined by binomial test and Bonferroni correction. (Data are represented as mean values with SD, ns  $p > 0.05$ , \*  $p \leq 0.05$ , \*\*  $p \leq 0.01$ , \*\*\*  $p \leq 0.001$ , \*\*\*\*  $p < 0.0001$ )

### Supplementary Figure 3

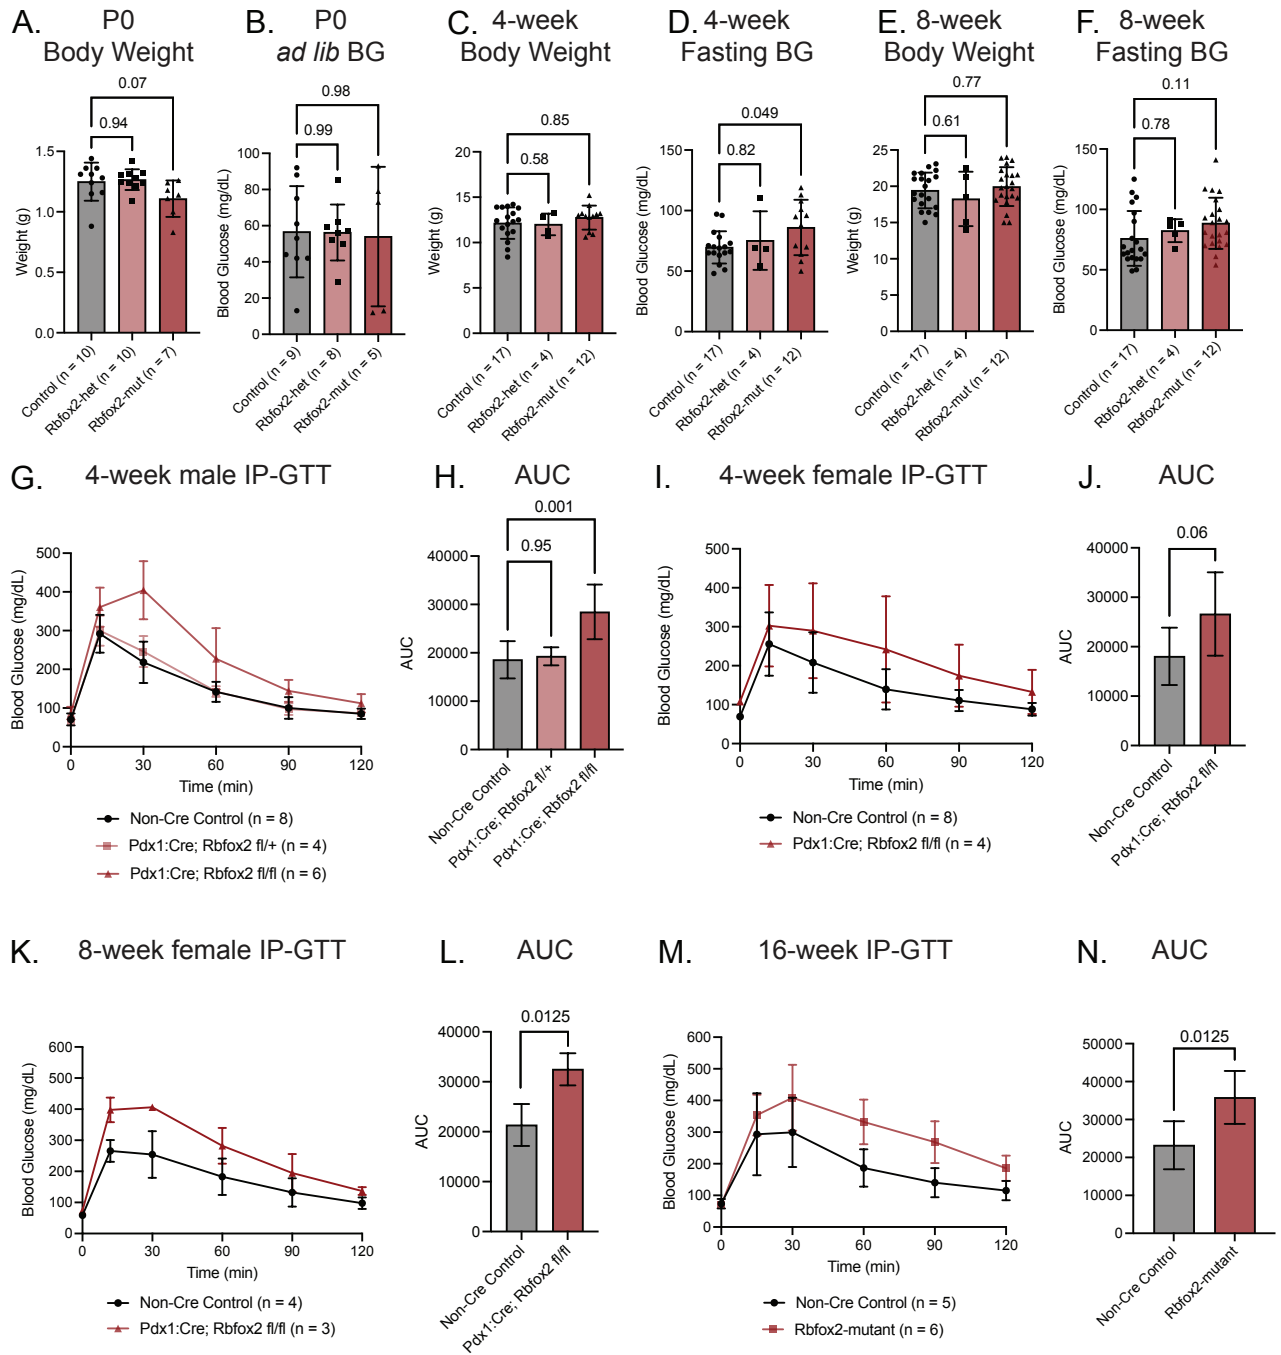

**Supplementary Figure 3. Related to Figure 2, *Rbfox2*-mutant mouse characterization.** (A) Post-natal day 0 (P0) body weight for control (*Rbfox2*<sup>fl/fl</sup>, n = 9), *Rbfox2*-het (*Pdx1*:CRE; *Rbfox2*<sup>fl/+</sup>, n = 8), and *Rbfox2*-mut (*Pdx1*:CRE; *Rbfox2*<sup>fl/fl</sup>, n = 8), one-way ANOVA with multiple comparisons, F = 2.289. (B) Post-natal day 0 (P0) *ad lib* blood glucose (BG) for control (n = 9), *Rbfox2*-het (*Pdx1*:CRE; n = 8), and *Rbfox2*-mut (n = 8), one-way ANOVA with multiple comparisons, F = 0.018. (C) 4-week body weight for control (n = 17), *Rbfox2*-het (n = 4), and *Rbfox2*-mut (n = 12), one-way ANOVA with multiple comparisons, F = 0.5698. (D) 4-week fasting blood glucose (BG) for control (n = 17), *Rbfox2*-het (n = 4), and *Rbfox2*-mut (n = 12), one-way ANOVA with multiple comparisons, F = 2.764. (E) 8-week body weight for control (n = 17), *Rbfox2*-het (n = 4), and *Rbfox2*-mut (n = 12), one-way ANOVA with multiple comparisons, F = 0.8367. (F) 8-week fasting blood glucose (BG) for control (n = 17), *Rbfox2*-het (n = 4), and *Rbfox2*-mut (n = 12), one-way ANOVA with multiple comparisons, F = 1.857. (G) Intraperitoneal glucose tolerance test (IP-GTT) in 4-week male mice, control (*Rbfox2*<sup>fl/fl</sup>, n = 8), *Rbfox2*-het (*Pdx1*:CRE; *Rbfox2*<sup>fl/+</sup>, n = 4) and *Rbfox2*-mut (*Pdx1*:CRE; *Rbfox2*<sup>fl/fl</sup>, n = 6). (H) Area under the curve (AUC) for 4-week male IP-GTT, one-way ANOVA with multiple comparisons F = 10.23. (I) IP-GTT in 4-week female mice, control (n = 8) and *Rbfox2*-mut (n = 4). (J) Area under the curve (AUC) for 4-week female IP-GTT, two-tailed t-test. (K) IP-GTT in 8-week female mice, control (n = 4) and *Rbfox2*-mut (n = 3). (L) Area under the curve (AUC) for 8-week female IP-GTT, two-tailed t-test. (M) IP-GTT in 16-week combined male and female mice, control (n = 4) and *Rbfox2*-mut (n = 3). (N) Area under the curve (AUC) for 16-week combined male and female IP-GTT, two-tailed t-test. (Data are represented as mean values with SD, ns p > 0.05, \* p ≤ 0.05, \*\* p ≤ 0.01, \*\*\* p ≤ 0.001, \*\*\*\* p < 0.0001)

## Supplementary Figure 4

### A. Alternative splicing analysis

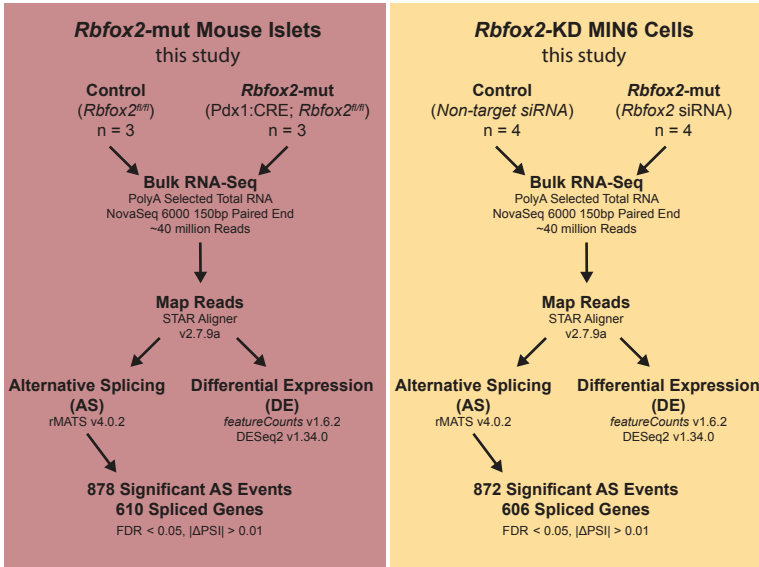

### B. RBFOX2 western blot quantification

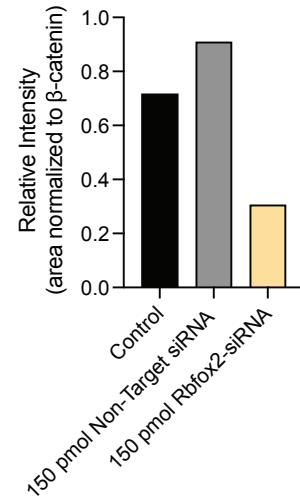

### C. *Rbfox* expression in *Rbfox2*-mut islets

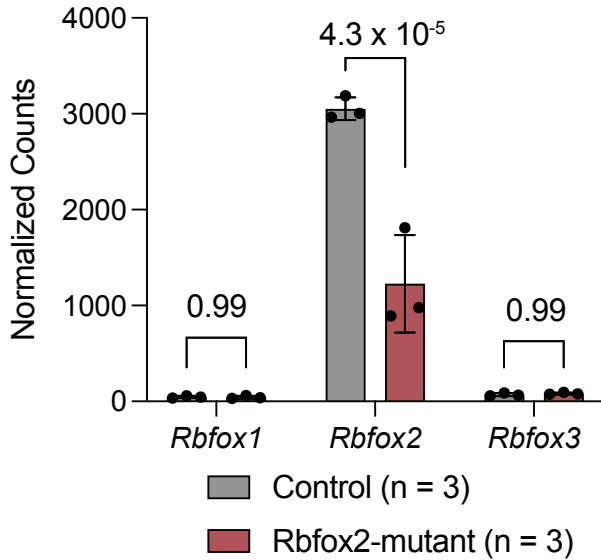

### D. Alternative Splicing Overlap

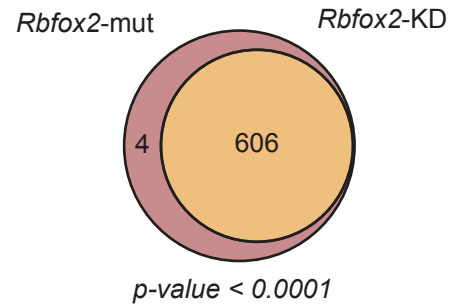



**Supplementary Figure 4. Related to Figure 3, Comparison of *Rbfox2*-mut mouse model and *Rbfox2*-KD MIN6 cell model.** (A) Analysis pipeline for comparing alternative splicing and gene expression both *Rbfox2*-mut islet bulk-RNA-Seq and *Rbfox2*-KD MIN6 cell bulk-RNA-Seq. (B) Quantification of RBFOX2 western from 150pmol *Rbfox2*-siRNA treatment in MIN6 cells. (C) *Rbfox1*, *Rbfox2*, and, *Rbfox3* expression in *Rbfox2*-mut islets, significance determined by DESeq2. (D) Overlap of alternatively spliced gene in *Rbfox2*-mut islets and *Rbfox2*-KD MIN6 cells at 1%  $\Delta$ PSI, significant overlap determined by hypergeometric analysis.

## Supplementary Figure 5

### A. Alternative Splicing Overlap

| Overlap of alternatively spliced genes in experimental models |         |                |               |
|---------------------------------------------------------------|---------|----------------|---------------|
| $\Delta$ PSI                                                  | Overlap | Islet Specific | MIN6 Specific |
| 1%                                                            | 606     | 4              | 0             |
| 5%                                                            | 427     | 4              | 0             |
| 10%                                                           | 230     | 4              | 0             |
| 25%                                                           | 41      | 0              | 0             |

*p*-value < 0.005

### B. Splicing pattern distribution

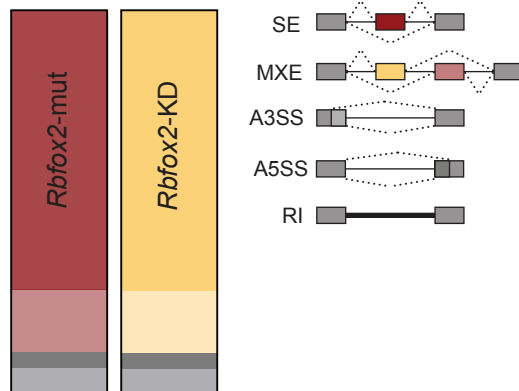

### C. Comparison of $\Delta$ PSI by splicing event *Rbfox2*-KD MIN6 and *Rbfox2*-mut Islet

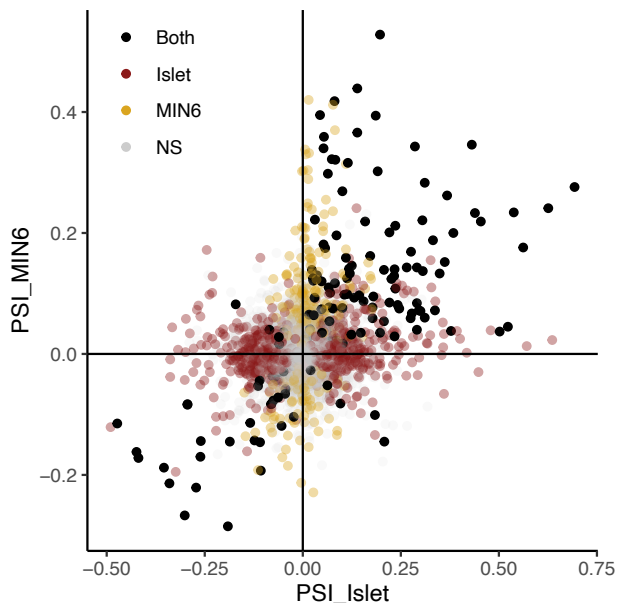

### D. Comparison of $\Delta$ PSI by splicing event T2D and *Rbfox2*-mut Islet

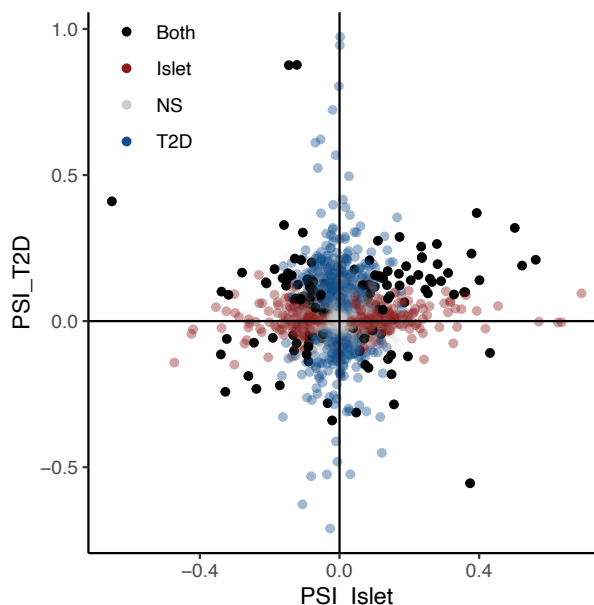

### E. Overlapping alternatively spliced genes (5% $\Delta$ PSI)

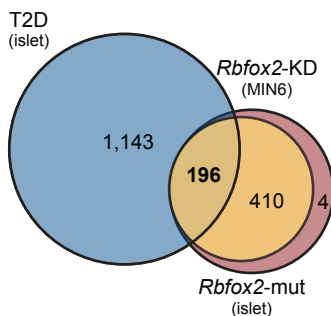

### F. GO Terms for overlapping genes (5% $\Delta$ PSI)

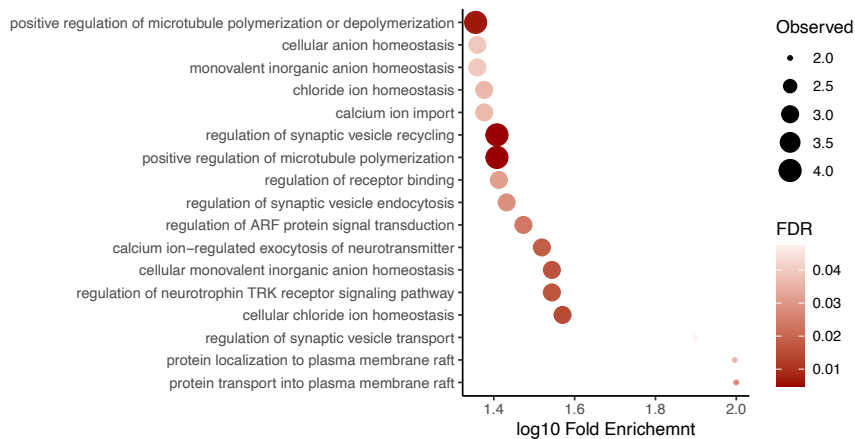

**Supplementary Figure 5. Related to Figure 3, Gene and exon level splicing overlap of *Rbfox2*-KD and *Rbfox2*-mut at 5%  $\Delta$ PSI.** (A) Overlap of alternatively spliced genes between *Rbfox2*-KD MIN6 cells and *Rbfox2*-mut islets with increasing  $\Delta$ PSI thresholds. (B) Splicing event type distribution for *Rbfox2*-KD MIN6 and *Rbfox2*-mut islet as identified by rMATS, 1%  $\Delta$ PSI cutoff. (C) Correlation between *Rbfox2*-KD MIN6 and *Rbfox2*-mut islet splicing events at the level of the exon, point color indicates significance – significant in both datasets (black), significant in *Rbfox2*-KD only (yellow), significant in *Rbfox2*-mut only (red), not significant (gray). (D) Correlation between *Rbfox2*-mut islet and T2D islet splicing events at the level of the exon, point color indicates significance – significant in both datasets (black), significant in *Rbfox2*-mut only (red), significant in T2D only (blue), not significant (gray). (E) Overlap of conserved alternative splicing events at 5%  $\Delta$ PSI across *Rbfox2*-KD MIN6, *Rbfox2*-mut islets, and T2D mouse islets (GSE183247). (F) GO Terms for 112 significantly alternatively spliced ( $\Delta$ PSI > 0.05) genes shared across *Rbfox2*-KD MIN6, *Rbfox2*-mut islets, and T2D mouse islets (GSE183247).

## Supplementary Figure 6

**A.** Cytoplasmic Area Analyzed/Cell

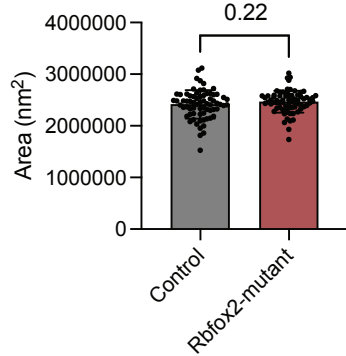

**B.** Cytoplasmic Depth of Quiry Region

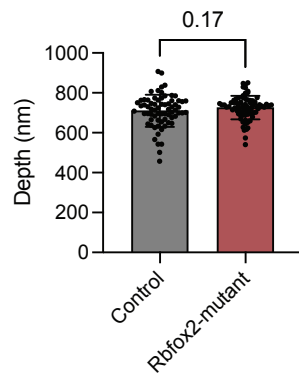

**C.** Insulin Granule Diameter

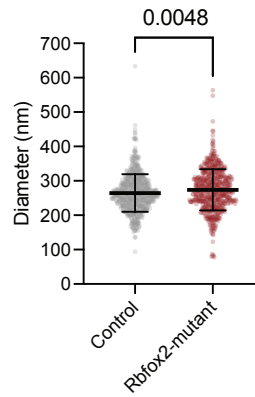

**D.** Insulin Granule Density

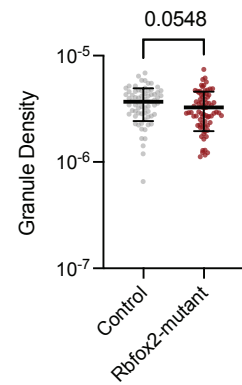

**E.** Glucose stimulated insulin secretion (M)

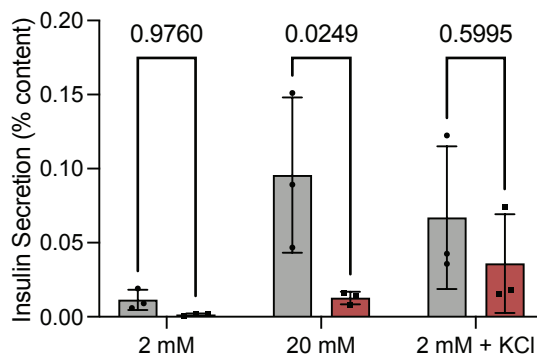

**F.** Glucose stimulated insulin secretion (F)

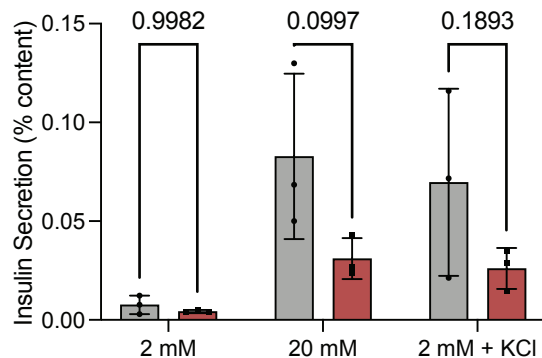

**G.** Plasma Insulin

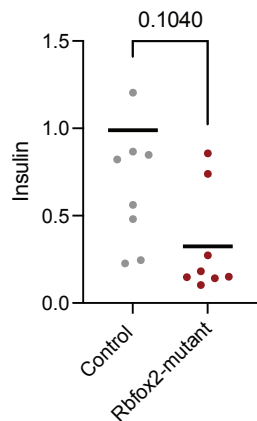

**H.** Capacitance traces

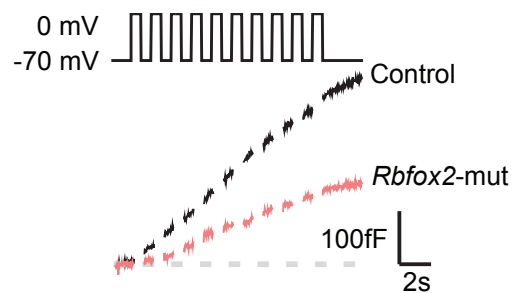

**I.** Calcium current

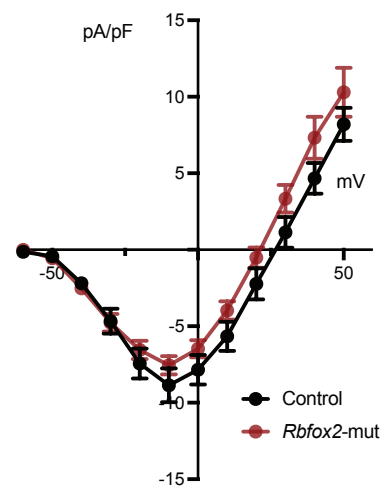

**Supplementary Figure 6. Related to Figure 4, Insulin secretion and insulin granule quantification.** (A) Cytoplasmic area quantified in insulin granule analysis, each dot is a cell, two-tailed t-test. (B) Cytoplasmic depth quantified in insulin granule analysis, each dot represents a cell, two-tailed t-test. (C) Insulin granule diameter, each dot represents an insulin granule, t-test. (D) Insulin granule density, each dot represents a  $\beta$  cell quantified, two-tailed t-test. (E) Glucose stimulated insulin secretion measured by ELISA, 8-week male mice, n = 3 mice per group, two-way ANOVA with multiple comparisons. (F) Glucose stimulated insulin secretion measured by ELISA, 8-week female, n = 3 mice per group, two-way ANOVA with multiple comparisons. (G) Plasma insulin measured by ELISA 15 min post glucose injection, n = 8 control and n = 7 mutant mice, t-test containing outlier, two-tailed t-test. (H) Capacitance trace. (I) Calcium current measurement for *Rbfox2*-mut and control  $\beta$  cells. (Data are represented as mean values with SD, ns p > 0.05, \* p  $\leq$  0.05, \*\* p  $\leq$  0.01, \*\*\* p  $\leq$  0.001, \*\*\*\* p < 0.0001)

## Supplementary Figure 7

### A. eCLIP experimental pipeline

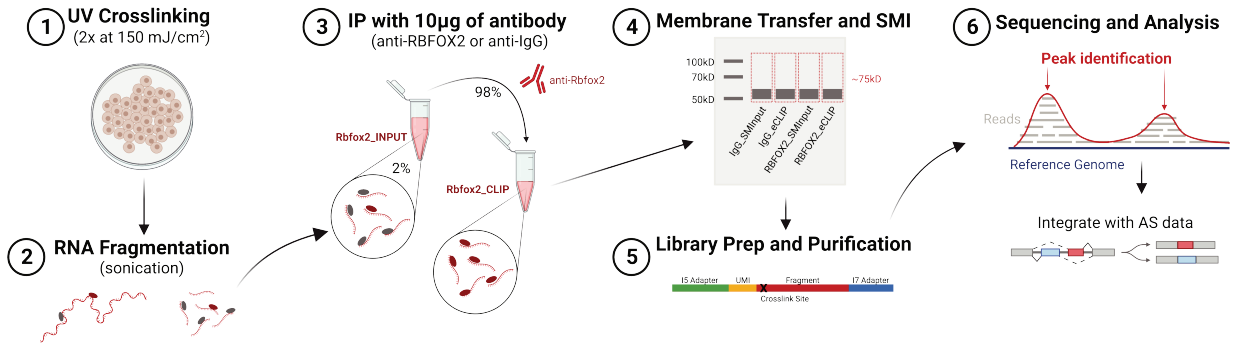

### B. RBFOX2-eCLIP enriched 6-mers

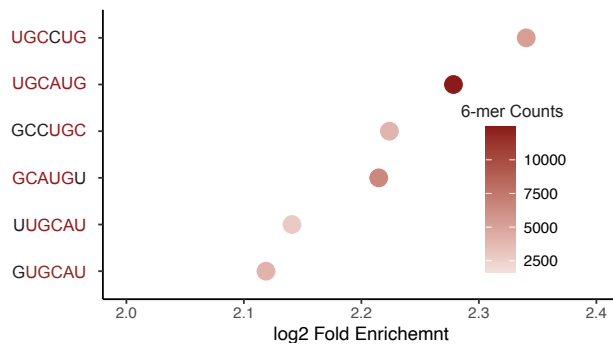

### C. RBFOX2-eCLIP peak width distribution

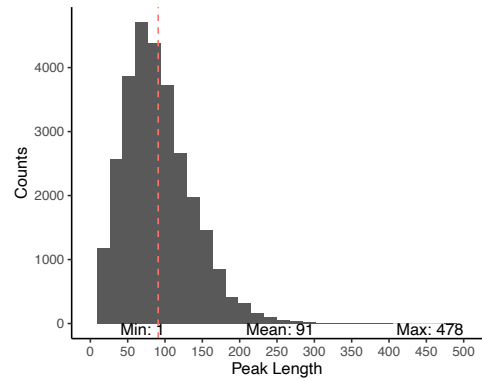

### D. RBFOX2-eCLIP peaks by transcript region

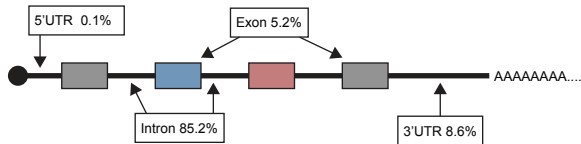

**Supplementary Figure 7. Related to Figure 5, RBFOX2-eCLIP sequencing and analysis.** (A) RBFOX2-eCLIP sequencing experimental pipeline – 1. UV crosslinking twice at 150 mJ/cm<sup>2</sup>, 2. RNA fragmentation by sonication, 3. IP with RBFOX2 and IgG antibody, 4. Size-matched input (SMI) collection and reverse crosslinking, 5. Library preparation, 6. Sequencing and analysis (BioRender). (B) Enriched 6-mers under significant RBFOX2 eCLIP peaks ( $p < 0.05$ ,  $\log_2FC > 0$ ). (C) RBFOX2-eCLIP peak width distribution ( $p < 0.05$ ,  $\log_2FC > 0$ ). (D) RBFOX2-eCLIP peak distribution within genes ( $p < 0.05$ ,  $\log_2FC > 0$ ).

## Supplementary Figure 8

A. RBFox2-eCLIP enriched 6-mers (Rep1)

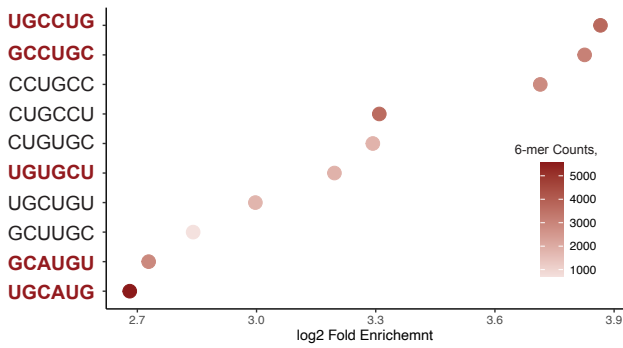

B. RBFox2-eCLIP enriched 6-mers (Rep2)

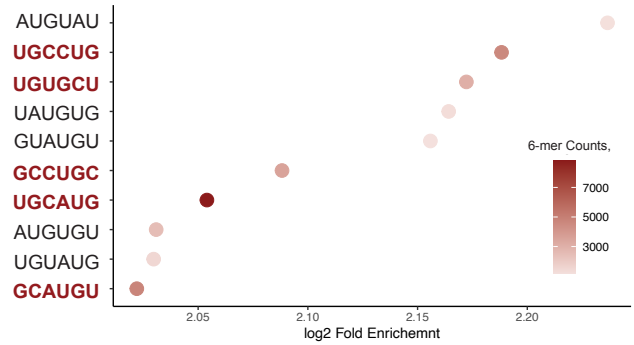

C. RBFox2-eCLIP peak width distribution (Rep1)

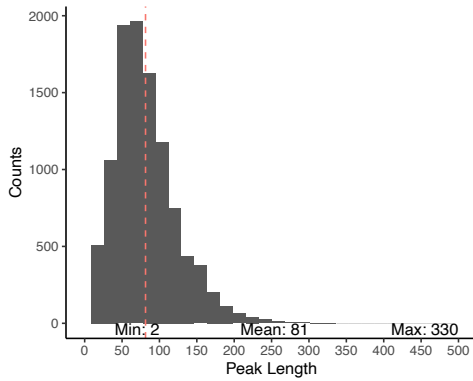

D. RBFox2-eCLIP peak width distribution (Rep2)

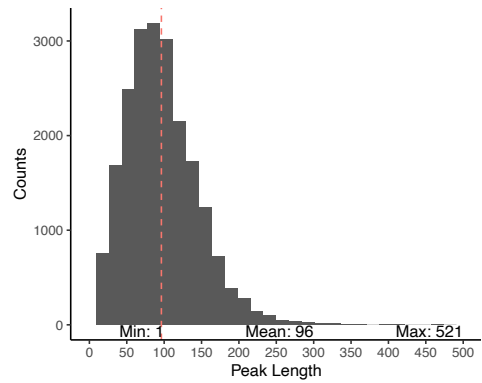

E. RBFox2-eCLIP peaks by transcript region (Rep1)

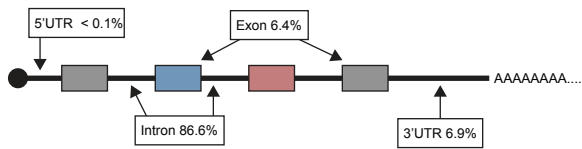

F. RBFox2-eCLIP peaks by transcript region (Rep2)

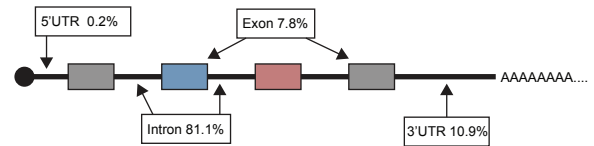

G. RBFox2-eCLIP replicate comparison

|                                                                         | RBFox2-eCLIP | Rep1  | Rep2  |
|-------------------------------------------------------------------------|--------------|-------|-------|
| Clipper output filtered for $p < 0.05$ and $\log_2FC > 0$ .             | 30993        | 10395 | 21285 |
| Peaks in genes, $\log_2FC > 0$ , $p < 0.05$ , and remove "Gm" and "Rik" | 20603        | 7596  | 13982 |
| Peaks in genes, $\log_2FC > 0$ , $p < 10^{-3}$                          | 6537         | 2397  | 4151  |
| Peaks in gene, Fold Enrichment $\geq 2$ , $p < 10^{-3}$                 | 6514         | 2387  | 4138  |
| 3'UTR                                                                   | 559          | 165   | 450   |
| 5'UTR                                                                   | 8            | 1     | 10    |
| Intron                                                                  | 5548         | 2068  | 3356  |
| Exon                                                                    | 339          | 153   | 322   |
| Genes with peaks                                                        | 2494         | 1238  | 1774  |
| Alternatively spliced genes                                             | 606          | 606   | 606   |
| Genes with peaks and AS                                                 | 251          | 140   | 206   |
| How many splicing events are in RBFox2 bound genes?                     | 411          | 234   | 342   |
| SE                                                                      | 304          | 174   | 262   |
| Inclusion                                                               | 224          | 124   | 189   |
| Skipping                                                                | 80           | 50    | 73    |
| MXE                                                                     | 78           | 43    | 60    |
| MXE Inclusion (1st Exon Included)                                       | 31           | 21    | 23    |
| MXE Skipping (1st Exon Skipped)                                         | 47           | 22    | 37    |
| A3SS                                                                    | 18           | 10    | 11    |
| A5SS                                                                    | 10           | 7     | 8     |
| RI                                                                      | 1            | 0     | 1     |
| Self-consistency ratio                                                  |              |       | 1.2   |
| Rescue ratio                                                            |              |       | 2.3   |
| IDR 0.01 replicating peaks                                              |              |       | 3300  |



**Supplementary Figure 8. Related to Figure 5, RBFOX2-eCLIP replicate analysis.** (A) Enriched 6-mers under significant RBFOX2 eCLIP peaks ( $p < 0.05$ ,  $\log_2FC > 0$ ) for replicate 1. (B) Enriched 6-mers under significant RBFOX2 eCLIP peaks ( $p < 0.05$ ,  $\log_2FC > 0$ ) for replicate 2. (C) RBFOX2-eCLIP peak width distribution ( $p < 0.05$ ,  $\log_2FC > 0$ ) for replicate 1. (D) RBFOX2-eCLIP peak width distribution ( $p < 0.05$ ,  $\log_2FC > 0$ ) for replicate 2. (E) RBFOX2-eCLIP peak distribution within genes replicate 1 ( $p < 0.05$ ,  $\log_2FC > 0$ ). (F) RBFOX2-eCLIP peak distribution within genes replicate 2 ( $p < 0.05$ ,  $\log_2FC > 0$ ). G. RBFOX2-eCLIP replicate comparison summary.

## Supplementary Figure 9

### A. RBFOX2 bound and alternatively spliced genes

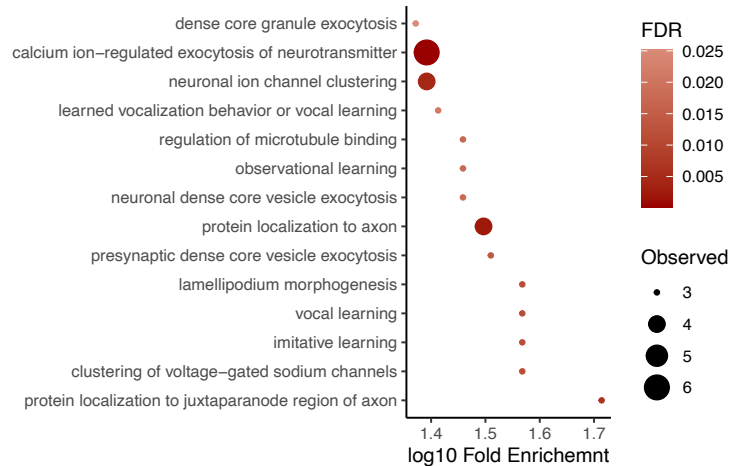

### B. *Syt7* alternative splicing and RBFOX2 binding

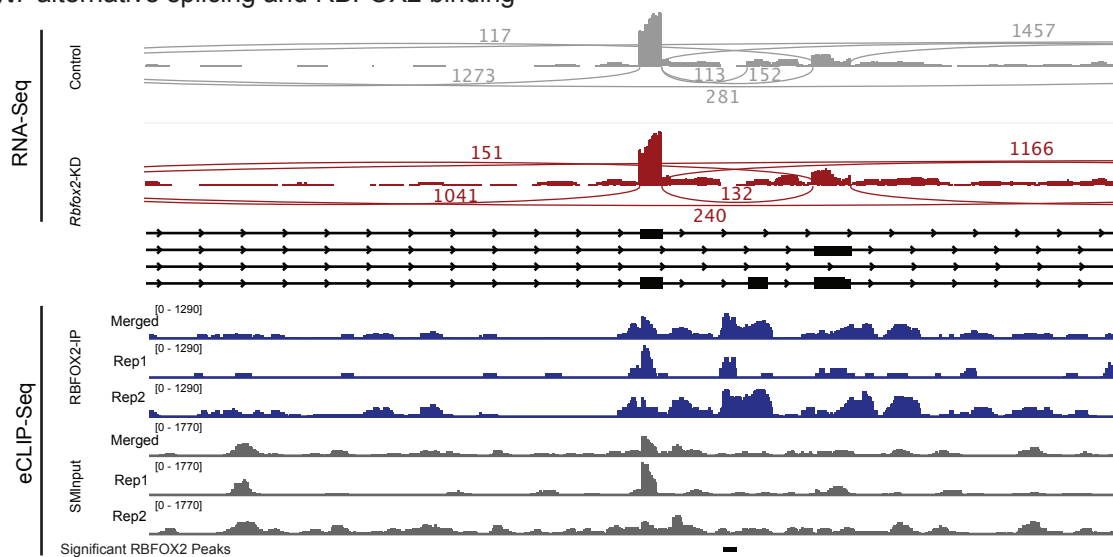

### C. *Stxbp1* alternative splicing and RBFOX2 binding

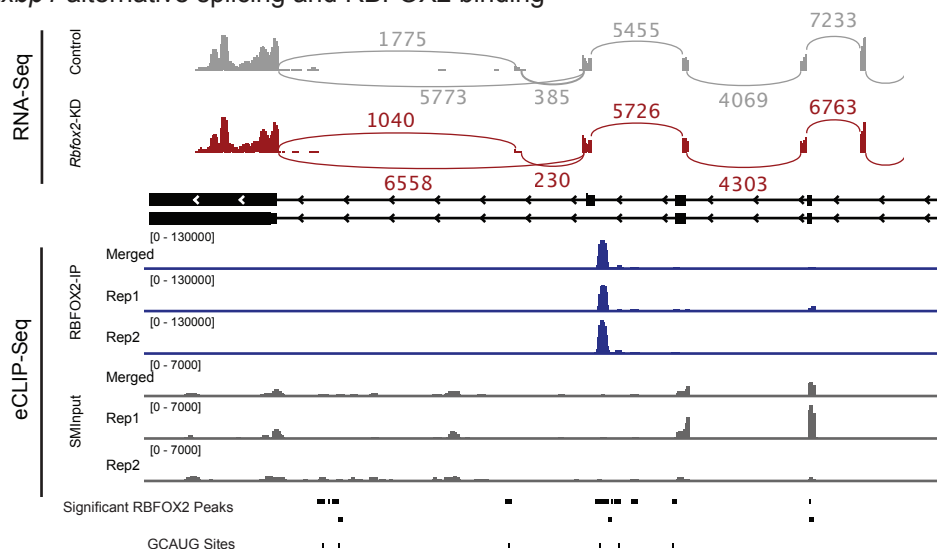

**Supplementary Figure 9. Related to Figure 6, RBFOX2 regulation of additional SNARE complex components.** (A) GOTerms for RBFOX2 bound and alternatively spliced transcripts. (B) Sashimi plot for *Syt7* SE with eCLIP peaks, RBFOX2 eCLIP-Seq (blue), *clipper* identified significant peaks (black bars), SMI eCLIP-Seq (gray). *Syt7*  $\Delta$ PSI = 0.06, FDR = 0.017. (C) Sashimi plot for *Stxbp1* SE with eCLIP peaks, RBFOX2 eCLIP-Seq (blue), *clipper* identified significant peaks (black bars), GCAUG sequence (black bars), SMI eCLIP-Seq (gray). *Stxbp1*  $\Delta$ PSI = 0.071, FDR < 0.0001.
